# Localization of a novel susceptibility gene for familial ovarian cancer to chromosome 3p22–p25

Masayuki Sekine, Hiroshi Nagata, Shoji Tsuji<sup>1</sup>, Yasuo Hirai<sup>2</sup>, Seiichiro Fujimoto<sup>3</sup>, Masayuki Hatae<sup>4</sup>, Iwao Kobayashi<sup>5</sup>, Tsuneo Fujii<sup>6</sup>, Ichiro Nagata<sup>7</sup>, Kimio Ushijima<sup>8</sup>, Koshiro Obata<sup>9</sup>, Mitsuaki Suzuki<sup>10</sup>, Mitsuhiro Yoshinaga<sup>11</sup>, Naohiko Umesaki<sup>12</sup>, Shinji Satoh<sup>13</sup>, Takayuki Enomoto<sup>14</sup>, Satoru Motoyama<sup>15</sup>, Kenichi Tanaka\* and The Japanese Familial Ovarian Cancer Study Group<sup>+</sup>

Department of Obstetrics and Gynecology and <sup>1</sup>Department of Neurology, Niigata University, School of Medicine, Niigata 951-8510, Japan, <sup>2</sup>Department of Gynecology, Cancer Institute Hospital, Tokyo 170-8455, Japan, <sup>3</sup>Department of Obstetrics and Gynecology, Hokkaido University, School of Medicine, Hokkaido 060-8638, Japan, <sup>4</sup>Department of Obstetrics and Gynecology, Kagoshima City Hospital, Kagoshima 892-8580, Japan, <sup>5</sup>Department of Obstetrics and Gynecology, Nagoya Daini Red Cross Hospital, Aichi 466-8650, Japan, <sup>6</sup>Department of Obstetrics and Gynecology, National Kure Medical Center, Hiroshima 737-0023, Japan, <sup>7</sup>Department of Obstetrics and Gynecology, National Defense Medical College, Saitama 359-8513, Japan, <sup>8</sup>Department of Obstetrics and Gynecology, Kurume University, School of Medicine, Fukuoka 830-0011, Japan, <sup>9</sup>Department of Obstetrics and Gynecology, Kinki University, School of Medicine, Osaka 589-8511, Japan, <sup>10</sup>Department of Obstetrics and Gynecology, Jichi Medical School, Tochigi 329-0498, Japan, <sup>11</sup>Department of Obstetrics and Gynecology, Kagoshima University, School of Medicine, Kagoshima 890-8520, Japan, <sup>12</sup>Department of Obstetrics and Gynecology, Osaka City University, School of Medicine, Osaka 545-8585, Japan, <sup>13</sup>Department of Obstetrics and Gynecology, Tohoku University, School of Medicine, Miyagi 980-8575, Japan, <sup>14</sup>Department of Obstetrics and Gynecology, Osaka University, School of Medicine, Osaka 565-0871, Japan and <sup>15</sup>Department of Obstetrics and Gynecology, Kobe University, School of Medicine, Hyogo 650-0017, Japan

Received March 9, 2001; Revised and Accepted April 26, 2001

**We performed genome-wide linkage analysis in 58 patients and nine unaffected members among 28 families with no mutation in *BRCA1* or *BRCA2*, employing a set of 410 microsatellite markers. We initially screened the whole genome, including the X chromosome, by a non-parametric method using the GENEHUNTER program. As a result, chromosome 3p22–p25 showed a suggestive score for linkage [LOD = 3.49 and non-parametric LOD (NPL) = 2.77 at *D3S3611*] based on a multipoint analysis. Additionally, based on a two-point analysis using dense markers, this 3p22–p25 region showed a *P*-value < 0.05 at 10 markers**

**and there is suggestive evidence for linkage at two markers within ~19 cM (NPL = 2.60 and 2.49 at *D3S1597* and *D3S3611*, respectively). To explore whether the candidate gene in this 3p22–p25 region contributed to carcinogenesis of familial ovarian cancer in a similar fashion to the tumor suppressor gene, we performed loss of heterozygosity (LOH) analysis. It was observed that the frequency of LOH at four markers in this region was >50% only in tumor tissues from patients with no mutation in *BRCA1* or *BRCA2*, not in those with a *BRCA1* mutation.**

\*To whom correspondence should be addressed at: Department of Obstetrics and Gynecology, Niigata University School of Medicine, 1-757, Asahimachi-dori, Niigata City 951-8510, Japan. Tel: +81 25 227 2320; Fax: +81 25 227 0789; Email: tanaken@med.niigata-u.ac.jp

<sup>+</sup>Collaborating groups, listed in random order: Atsushi Arakawa (Nagoya City University), Tadayuki Ishimaru (Nagasaki University), Shinji Izuma (Osaka Medical College), Hisashi Ichikawa (Sekishindo Hospital), Yuji Ito (St Mary's Hospital), Tohru Inoue (Tokyo Kouseininken Hospital), Mari Iwamoto (Ehime University), Hisao Osada (Chiba University), Kazuya Oshima (Nantan General Hospital), Takaaki Oda (National Kokura Hospital), Masayuki Ohno (Kagawa Medical University), Hidetaka Katabuchi (Kumamoto University), Koji Kanazawa (University of the Ryukyus), Hiroyuki Kamata (Tochigi Cancer Center), Hirokatsu Kitai (Saitama Social Insurance Hospital), Yoshiro Kidera (Sasebo Kyosai Hospital), Takafumi Kudoh (Okayama University), Kazuo Kuzuya (Aichi Cancer Center Hospital), Hiroshi Kobayashi (Hamamatsu University), Hideki Sakamoto (Nihon University), Shigeru Sasaki (The Tama-Nagayama Hospital of Nippon Medical School), Fumitaka Saji (Osaka Medical Center for Cancer and Cardiovascular Disease), Tsuneo Jimbo (Tokyo Rosai Hospital), Toshiko Jobo (Kitasato University), Akira Suzuki (Osaka National Hospital), Kenji Suzuki (Keiyu Hospital), Masato Sudo (Yamamoto General Hospital), Michiko Takahashi (Saitama Cancer Center), Ken Takizawa (Mitsui Memorial Hospital), Tamikazu Tazaki (Social Insurance Kurume Daiichi Hospital), Hideo Tajima (Saitama Medical Center Hospital), Tadao Tanaka (The Jikei University), Ichiro Taniguchi (Oita Prefectural Hospital), Teruhiko Tamaya (Gifu University), Masahiko Tsujimoto (Osaka Police Hospital), Akitsu Tsunawaki (Kumamoto City General Hospital), Yoshihiro Teramoto (Nara National Hospital), Nagayasu Toyoda (Mie University), Yasuji Nogami (Gunma Social Insurance Hospital), Tsuneo Noda (Seirei-mikatahara General Hospital), Kazuo Hasegawa (Hyogo Medical Center for Adults), Toshio Hirakawa (Kyusyu University), Hideharu Fujii (National Nagasaki Medical Center), Keiichi Fujiwara (Kawasaki Medical School), Masaki Mandai (Kyoto University), Toshihisa Mori (Kitakyusyu City Medical Center), Masazumi Yajima (Tokyo Women's Medical University), Makoto Yasuda (The Kashiwa Hospital of Jikei University), Tatsuo Yamato (Kosei General Hospital), Kumio Yamamoto (Osaka City General Medical Center), Tsutomu Yamamoto (Koshigaya Municipal Hospital), Yasuhisa Yamamoto (Omoto Hospital), Yuichi Wada (Sendai National Hospital)

## INTRODUCTION

Ovarian cancer is the most lethal among gynecological malignant cancers. Approximately 5–10% of cases are thought to have a hereditary basis (1), and a positive family history of ovarian cancer is one of the strongest and most consistent of the risk factors for development of the disease. It has been reported that first-degree relatives of ovarian cancer patients were found to be at a 2- to 4-fold increased risk of developing the disease (2,3). Familial ovarian cancer occurs in two distinct groups; site-specific ovarian cancer families and breast-ovarian cancer families (4).

Until now, the *BRCA1* gene on chromosome 17q21 and the *BRCA2* gene on chromosome 13q12–q13 have been identified by positional cloning methods followed by genetic linkage analysis for familial breast cancer (5,6). Germline mutations of *BRCA1* are predicted to be responsible for ~45% of breast cancer families and 80% of breast-ovarian cancer families (7–9). Both male and female *BRCA2* carriers have a high risk of early-onset breast cancer; however, ovarian cancer was initially thought to be a much less prominent feature of these families, but it is now thought that *BRCA2* may account for as much as 10–35% of familial ovarian cancers (9,10). Recently, it has been reported that about half of ovarian cancer families are not caused by these two genes (11,12). These data suggest that the contribution of other ovarian cancer susceptibility genes cannot be excluded. In a previous study, we reported 11 independent *BRCA1* mutations in 26 patients of 12 families: nine patients in four site-specific ovarian cancer families and 17 patients in eight breast-ovarian cancer families. There were no significant differences of average age at diagnosis between *BRCA1* cases and sporadic cases, and 24 of 25 patients with germline mutation of *BRCA1* had a serous type of adenocarcinoma (13,14).

In sporadic ovarian cancer, several interesting tumor suppressor genes, such as *NOEY2*, *PTEN* and *OVCA1*, 2, have been identified (15–18). However, little evidence has been reported suggesting that these genes are important in the pathogenesis of sporadic ovarian cancers, and their roles in the development of familial ovarian cancer are still unknown.

A segregation analysis suggested that familial ovarian cancer is due to low penetrant, dominant or recessive genes (19–21). The observation that, in general, ovarian cancer clusters are smaller than those observed in other cancers (e.g. breast and colon cancers) could be explained either by a lower recall of family history among females or by the model that ovarian cancer predisposition is due to a lower-penetrance gene than other cancer susceptibility genes. Eccles *et al.* (19) estimated a lower penetrance (50%) of these susceptibility genes under the best fitting dominant model.

In this present study, we analyzed genetic alterations of *BRCA1* and *BRCA2* in familial ovarian cancer patients. In addition, we performed genome-wide linkage analysis in families in which no mutation was found in *BRCA1* or *BRCA2* to identify novel susceptibility genes of familial ovarian cancer other than *BRCA1* and *BRCA2*.

## RESULTS

### Patients

We ascertained and performed direct sequencing of available patients with 196 epithelial familial ovarian cancer patients in all 81 families for mutational analysis in *BRCA1* and *BRCA2*. Among the 81 ovarian cancer families, we found 39 and five families carrying germline mutations of *BRCA1* and *BRCA2*, respectively. In 24 independent mutations of *BRCA1*, 18 mutations of *BRCA1* had never been described previously (M. Sekine, H. Nagata, S. Tsuji, Y. Hirai, S. Fujimoto, M. Hatae, I. Kobayashi, T. Fujii, I. Nagata, K. Ushijima, K. Obata, M. Suzuki, M. Yoshinaga, N. Umesaki, S. Satoh, T. Enomoto, S. Motoyama, K. Tanaka and The Japanese Familial Ovarian Cancer Study Group, manuscript in preparation). No germline mutation of *BRCA1* or *BRCA2* was detected in 78 affected patients in 37 families. Regarding the other cancers in these 37 families, family history was analyzed in the third degree relatives and second degree relatives for breast cancer and other histologic types of all cancers, respectively. Five families had one breast cancer patient other than ovarian cancer patients. The mean age at diagnosis of these five breast cancer patients was 48.0 years. In addition, two pairs of individual cancers, hepatic and gallbladder cancer, and stomach and hepatic cancer, were found in two independent families, and one histologic type of cancer, e.g. stomach, esophageal, hepatic, oral cavity, pancreatic, rectal, lung or uterine cancer, was observed in 12 independent families. Four ovarian cancer patients had a personal history of other types of previously diagnosed cancers, such as breast, bladder, endometrial and pancreatic cancer.

Table 1 demonstrates the clinical characteristics of 78 patients with no mutation in *BRCA1* or *BRCA2*, and 1299 control patients from the cancer registry of Niigata in Japan from 1983 to 1996 (22). The mean age at diagnosis of patients with tumors with no mutation, 49.7 years, was significantly younger than that in the control cases, 54.2 years ( $P = 0.0076$ ). In the histologic subtypes, there was a significantly lower proportion of tumors with mucinous adenocarcinoma in the no mutation cases than in the control cases ( $P = 0.038$ ). Although ~80% of the histologic types of *BRCA*-associated tumors were related to serous adenocarcinoma (Sekine *et al.*, manuscript in preparation) (13), the proportion of tumors with serous adenocarcinoma in the no mutation groups tended to be higher than those in the control groups, but not statistically significant ( $P = 0.051$ ). No difference was seen in the stage distribution between the tumors with no mutation and those of the controls.

### Genome-wide linkage analysis

Among the 37 families with no mutation of *BRCA1* or *BRCA2*, we performed genome-wide linkage analysis in 28 families with 58 affected patients and with nine unaffected members. Nine families were excluded from this analysis because they consisted of only mother–daughter affected pairs. Table 2 represents the details of the 28 families analyzed. Sister–sister relationships were the most common and accounted for 48 cases among 24 families. Aunt–niece relationships consisted of four cases in two families. Sister–sister–niece relationships involved three cases in one family. Niece–aunt–cousin

**Table 1.** Clinical and pathological characteristics of familial and sporadic ovarian cancer

|              | No. of cases (%)       |                     | <i>P</i> -value |
|--------------|------------------------|---------------------|-----------------|
|              | Familial (no mutation) | Population controls |                 |
| Total        | 78                     | 1299                |                 |
| Age (years)  |                        |                     |                 |
| Mean ± SD    | 49.7 ± 9.6             | 54.2 ± 13.5         | 0.0076          |
| Range        | 25–68                  | 12–94               |                 |
| Histology    |                        |                     |                 |
| Serous       | 40 (54.8)              | 524 (44.3)          | NS              |
| Endometrioid | 8 (11.0)               | 157 (13.3)          | NS              |
| Mucinous     | 10 (13.7)              | 273 (23.1)          | 0.038           |
| Clear cell   | 11 (15.1)              | 164 (13.9)          | NS              |
| Others       | 4 (5.5)                | 66 (5.6)            |                 |
| Unknown      | 5                      | 115                 |                 |
| Stage        |                        |                     |                 |
| I            | 25 (45.5)              | 553 (43.1)          | NS              |
| II           | 9 (16.4)               | 167 (13.0)          | NS              |
| III          | 13 (23.6)              | 434 (33.9)          | NS              |
| IV           | 8 (14.5)               | 128 (10.0)          | NS              |
| Unknown      | 23                     | 17                  |                 |

NS, not significant.

relationships consisted of three cases in one family. We initially screened the whole genome, including the X chromosome, by a multipoint non-parametric method using the GENEHUNTER program (23). As a result, suggestive linkage [non-parametric LOD (NPL)  $\geq 2.2$ ] was detected in only one region, chromosome 3p22–p25 (NPL = 2.77 at *D3S3611*), in the genome scan (Fig. 1).

Subsequently, multipoint parametric analyses were conducted to assess whether a dominant or recessive model could be adapted for the novel susceptibility gene. Based on the best fitting dominant gene from the result of our segregation analysis (data not shown), we obtained a heterogeneity LOD (hLOD) score of 3.49 and a homogeneity LOD (LOD) score of 3.49 on 3p22–p25. On the other hand, based on the recessive gene from the result of the described segregation analysis (21), we obtained a hLOD score of only 1.41 and a LOD score of  $-0.086$  at the region.

The results of the two-point non-parametric and parametric analyses on 3p with GENEHUNTER, employing 28 markers spanning from *D3S1297* (3pter) to *D3S3518* (3p21), showed a

*P*-value of  $<0.05$  in eight markers and a suggestive score for linkage at two markers (NPL = 2.60 and 2.49 at *D3S1597* and *D3S3611*, respectively; Table 3). The result of a *P*-value of  $<0.05$  at 10 markers within  $\sim 19$ cM (16.5–35.8 cM) was evidenced by the SIBPAL program (24).

#### Loss of heterozygosity (LOH) analysis

For further experiments, we performed LOH analysis in an attempt to determine whether the candidate gene on 3p22–p25 contributed to the tumorigenesis as the tumor suppressor gene or in the hope of narrowing the candidate region obtained by linkage analysis. LOH analyses with the 28 markers, located from *D3S1297* to *D3S3518*, was performed on all available tumor samples, which included 50 samples with no mutation in 28 families and 58 samples with the *BRCA1* mutation in 39 families (Table 4). As a result, at the four markers in the 3p22–p25 region, *D3S3591*, *D3S3611*, *D3S3610* and *D3S1554*, LOH was detected in  $>50\%$  of informative samples of patients with no mutation. However, the frequency of LOH at these four markers was decreased in tumor samples with the *BRCA1* mutation (50.0% versus 22.9%, 51.6% versus 31.7%, 52.6% versus 24.0% and 52.9% versus 40.0%, respectively). In addition, high frequency of LOH at one marker, existing at the edge of chromosome 3p near the telomere, was observed in both samples with or without the *BRCA1* mutation (50.0% and 53.8%).

Subsequently, we performed microsatellite instability (MSI) analysis on 50 tumor samples from patients without mutation, employing the same 28 markers used in the LOH analysis, to examine the probability of mismatch repair genes associated with MSI contributing to the generation of familial ovarian cancer, since one of the genes, *MLH1*, had been reported to be

**Table 2.** Characteristics of ovarian cancer families in linkage analysis

| Relationship        | No. of cases | No. of families |
|---------------------|--------------|-----------------|
| Sister/sister       | 48           | 24              |
| Aunt/niece          | 4            | 2               |
| Sister/sister/niece | 3            | 1               |
| Niece/aunt/cousin   | 3            | 1               |
| Total               | 58           | 28              |

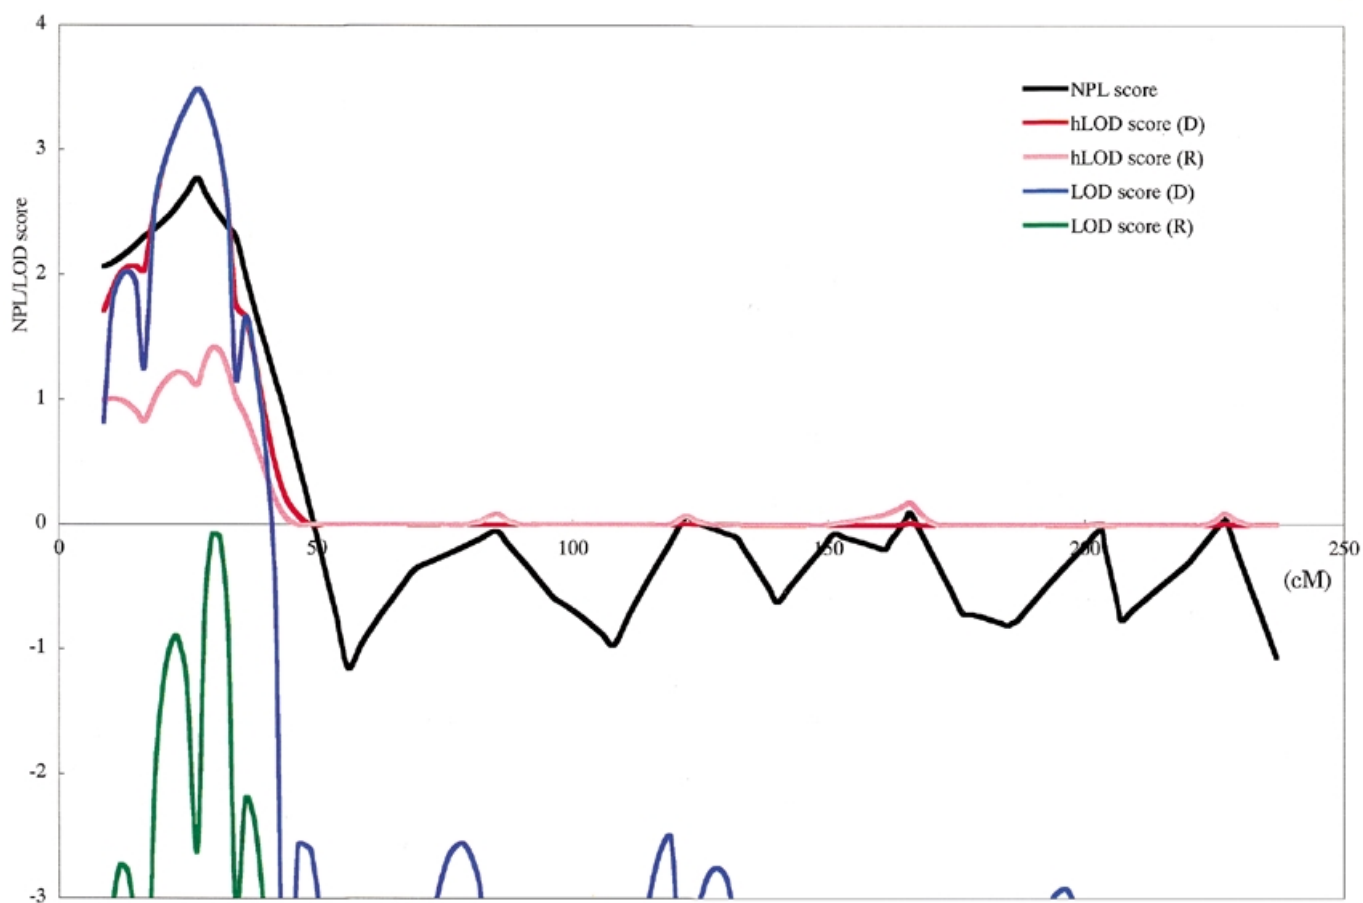

**Figure 1.** Multipoint non-parametric and parametric analyses for chromosome 3 from a genome-wide scan using GENEHUNTER. The x-axis represents the genetic distance along the chromosome in cM from the 3pter and the y-axis is used to depict the NPL score (black), the heterogeneity LOD (hLOD) score (red and pink) and the homogeneity LOD (LOD) score (blue and green). D, assumed the best fitting dominant model by the result of segregation analysis; R, assumed the recessive model by the result of the described segregation analysis (21). We obtained an NPL score of 2.77 (black), a hLOD score (D) of 3.49 (red), a hLOD score (R) of 1.41 (pink), a LOD score (D) of 3.49 (blue) and a LOD score (R) of  $-0.086$  (green) on 3p22–p25.

located at 3p21. Less than 20% of the tumor samples revealed MSI for all the analyzed markers.

## DISCUSSION

In 37 of the 81 ovarian cancer families, we could not detect germline mutation of *BRCA1* or *BRCA2* based on a direct sequencing method. Although it has been reported that no germline mutation of *BRCA1* or *BRCA2* was found in substantial numbers of ovarian cancer families, whether the other gene contributes to the generation of these familial ovarian cancer remains controversial. Gayther *et al.* (12) suggested that a combination of chance clustering of sporadic cases and insensitivity of mutation detection might have accounted for the remaining families. It appeared to be unlikely that the 28 families examined in this study were occasionally a clustering of sporadic cases judging from the clinical aspects, which involved the following: (i) the younger mean age at diagnosis of familial ovarian cancer patients with no mutation and (ii) the fact that the lifetime risk of ovarian cancer for Japanese women is three or four times lower than that in the USA (25). Also, the differences between ovarian cancer families with no mutation

and those with the mutation of *BRCA1* or *BRCA2* could be considered. First, there is very little chance of including breast cancer patients in ovarian cancer families with no mutation compared with those with the mutation of *BRCA1* or *BRCA2* ( $6/37 = 16.2\%$  versus  $20/44 = 45.5\%$ ). Secondly, the number of affected members in ovarian cancer families with no mutation were fewer compared with those with the mutation of *BRCA1* or *BRCA2* (2.16 versus 2.73; Table 5), suggesting that the penetrance of the novel gene, if it exists, may be relatively low in comparison with that of *BRCA1*, whose penetrance rate in Japanese familial ovarian cancers was preliminarily calculated to be high;  $\sim 79\%$  (13). In addition, insensitivity of mutation detection could be related to the technical variation of detecting the mutation of *BRCA1* or *BRCA2*. In the current experiments, a direct sequencing method of the entire exons, including the intronic boundary regions, was employed, although several other institutes carried out detection analysis based on single-strand conformation polymorphism and/or protein truncation test. In fact, we could find three missense mutations in 39 families with the *BRCA1* mutation (Sekine *et al.*, manuscript in preparation). Therefore, as these findings raise the possibility that additional susceptibility genes for

**Table 3.** Two-point linkage analyses with dense markers at candidate region on 3p

| Locus                 | Position (cM) | GENEHUNTER |            |           |                 | SIBPAL          |
|-----------------------|---------------|------------|------------|-----------|-----------------|-----------------|
|                       |               | LOD score  | hLOD score | NPL score | <i>P</i> -value | <i>P</i> -value |
| <i>D3S1297</i>        | 2.5           | -20.5294   | -0.0012    | -0.4940   | 0.6883          | 0.7893          |
| <i>D3S3525</i>        | 3.1           | -8.3380    | 0.0725     | 0.2615    | 0.3988          | 0.5993          |
| <i>D3S3630</i>        | 4.9           | -7.3938    | 0.3646     | 0.7929    | 0.2154          | 0.3655          |
| <i>D3S1620</i>        | 8.7           | -2.3128    | 1.1065     | 1.3733    | 0.0852          | 0.0612          |
| <i>D3S1560</i>        | 12.9          | -25.2070   | -0.0008    | -0.8776   | 0.8095          | 0.8483          |
| <b><i>D3S1304</i></b> | <b>16.5</b>   | -2.3430    | 1.1033     | 1.5892    | 0.0561          | <b>0.0191</b>   |
| <i>D3S3591</i>        | 19.0          | -10.3357   | 0.7801     | 1.4464    | 0.0754          | 0.0973          |
| <b><i>D3S3691</i></b> | <b>23.2</b>   | 1.7269     | 1.7253     | 1.5951    | 0.0558          | <b>0.0266</b>   |
| <b><i>D3S1597</i></b> | <b>24.1</b>   | 3.2076     | 3.2073     | 2.6036    | <b>0.0045</b>   | <b>0.0001</b>   |
| <b><i>D3S3611</i></b> | <b>26.7</b>   | 3.1739     | 3.1735     | 2.4858    | <b>0.0063</b>   | <b>0.0020</b>   |
| <b><i>D3S3589</i></b> | <b>26.7</b>   | -1.7828    | 1.5367     | 1.8182    | <b>0.0346</b>   | <b>0.0256</b>   |
| <i>D3S3693</i>        | 30.4          | -10.5143   | 0.6706     | 1.3609    | 0.0877          | 0.1294          |
| <i>D3S3714</i>        | 30.9          | 0.9244     | 0.9194     | 0.9974    | 0.1605          | 0.1320          |
| <b><i>D3S1263</i></b> | <b>30.9</b>   | -1.5393    | 1.5803     | 1.9722    | <b>0.0244</b>   | <b>0.0284</b>   |
| <b><i>D3S3680</i></b> | <b>30.9</b>   | -1.9176    | 1.4466     | 1.8296    | <b>0.0337</b>   | <b>0.0222</b>   |
| <i>D3S1259</i>        | 30.9          | 0.5889     | 0.5967     | 0.8007    | 0.2139          | 0.1605          |
| <i>D3S3610</i>        | 31.4          | 0.3733     | 0.4728     | 0.7847    | 0.2176          | 0.2001          |
| <b><i>D3S1585</i></b> | <b>33.0</b>   | 2.0557     | 2.0547     | 1.8932    | <b>0.0294</b>   | <b>0.0083</b>   |
| <b><i>D3S3608</i></b> | <b>33.5</b>   | -1.3734    | 1.6389     | 2.1019    | <b>0.0177</b>   | <b>0.0023</b>   |
| <i>D3S1554</i>        | 35.7          | 0.3780     | 0.5003     | 0.7612    | 0.2235          | 0.1434          |
| <b><i>D3S1286</i></b> | <b>35.8</b>   | -1.7709    | 1.5676     | 1.9585    | <b>0.0251</b>   | <b>0.0116</b>   |
| <i>D3S1293</i>        | 36.9          | -3.2542    | 0.5098     | 1.0380    | 0.1502          | 0.0834          |
| <i>D3S1599</i>        | 38.9          | -2.2836    | 0.0030     | 0.2145    | 0.4134          | 0.3265          |
| <i>D3S3659</i>        | 40.7          | -7.4673    | 0.0898     | 0.3940    | 0.3468          | 0.1740          |
| <i>D3S2336</i>        | 43.2          | -14.6197   | 0.3590     | 1.1714    | 0.1218          | 0.1227          |
| <i>D3S2337</i>        | 45.0          | -5.1279    | -0.0033    | -0.0664   | 0.5253          | 0.3994          |
| <i>D3S1283</i>        | 46.8          | -15.5727   | 0.0707     | 0.5355    | 0.2977          | 0.1653          |
| <i>D3S3518</i>        | 55.4          | -34.3256   | -0.0003    | -1.5536   | 0.9400          | 0.8960          |

Data in bold typeface represent a *P*-value <0.05.

familial ovarian cancer are expected to exist, we performed genome-wide linkage analysis for further investigation to identify novel susceptibility genes.

Since the mode of inheritance for familial ovarian cancer is still controversial (19–21), we initially screened the whole genome by a multipoint non-parametric method with the GENEHUNTER program (23). In our genome scan, only one locus, chromosome 3p22–p25, showed evidence of a suggestive linkage. In addition, the results of further experiments in this region using dense microsatellite markers will verify the reliability of the candidate on the 3p22–p25 region obtained by screening with multipoint non-parametric analysis.

One disadvantage of the non-parametric linkage analysis which has been pointed out is that numerous affected pairs are necessary for sufficient analysis, and that the rate of false-posi-

tivity is high compared with classical parametric analysis. In our experiments, the suggestive score was obtained based on a relatively limited number of families. This could be explained by the following: First, families associated with the *BRCA1* or *BRCA2* mutation were excluded from the analyzable data, and secondly, Japanese are a relatively uniform population genetically. In addition, as we preliminarily determined allele frequencies of all markers in Japanese women, the possibility of obtaining a false-positive score appeared to be low.

Several tumor suppressor genes are reported to exist around the 3p22–p25 region, such as *VHL* (OMIM: 193300) and *XPC* (OMIM: 278720) located at 3p25, *TGFBR2* (OMIM: 190182) at 3p22, and *MLH1* (OMIM: 120436) at 3p21 (Fig. 2). However, one could eliminate the possibility that the additional tumor suppressor gene on 3p22–p25 for familial ovarian cancer is identical to these genes. This must be true because

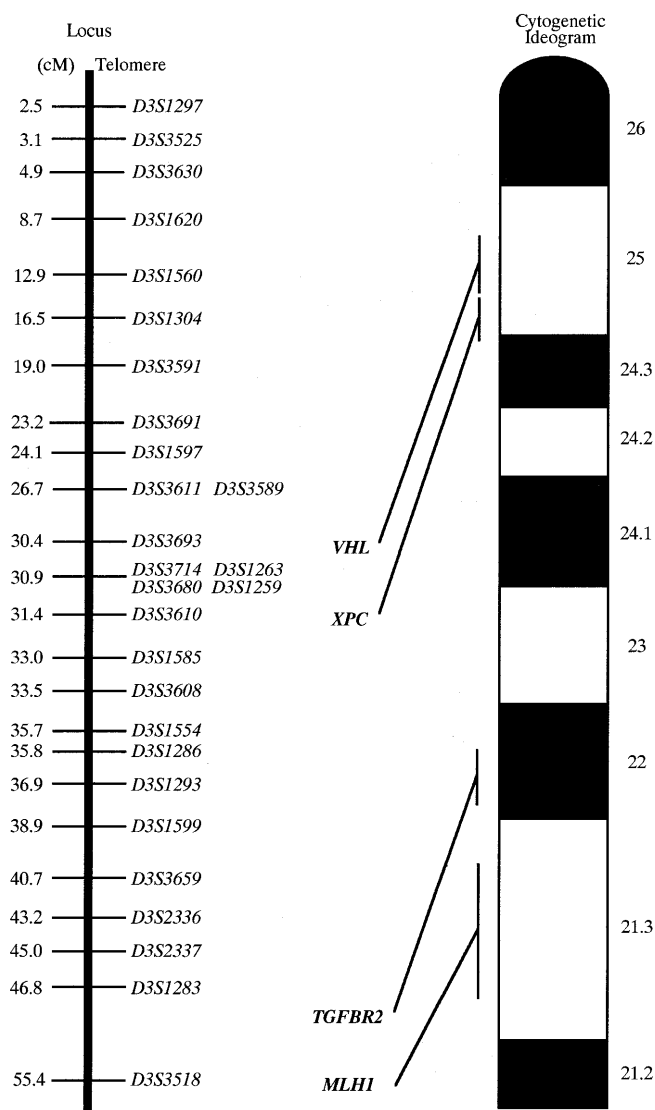

**Figure 2.** Summary of microsatellite markers used in the analysis and regions of interest on chromosome 3p. Genetic markers used in the analysis are listed in descending order from the 3pter to 3p21 according to recent websites (<http://www.ncbi.nlm.nih.gov/genemap/> and <http://www.ncbi.nlm.nih.gov/Entrez/>). The approximate physical maps of markers and genes, *VHL*, *XPC*, *TGFBR2* and *MLH1* are also shown.

there is no evidence for an excess risk of epithelial ovarian cancer in carriers with mutation of *VHL*, *XPC* or *TGFBR2* (26–30). In addition, as a result of the MSI analysis, the possibility of the contribution of *MLH1* in the 28 families analyzed is unlikely. Several other genes mapped to this region, such as *OGG1* (8-oxoguanine DNA glycosylase, OMIM: 601982) and *RAF1* (v-raf-1 murine leukemia viral oncogene homolog 1, OMIM: 164760) at 3p25, *TOP2B* (topoisomerase II  $\beta$ , OMIM: 126431) and *PCAF* (p300/CBP-associated factor, OMIM: 602303) at 3p24, and *RAB5A* (member of the RAS oncogene family, OMIM: 179512) at 3p22–p24, may be implicated in the process of carcinogenesis, so these genes possess the probability of being candidate genes for familial ovarian cancer.

As a result of the LOH analysis, high frequency of LOH was observed in both no mutation and *BRCA1* mutation groups at

*D3S1297* at the end of chromosome 3p. It has been documented that the end of the chromosome arm close to the telomere was more unstable than the other sites, suggesting the reliability of the results. In the present experiment, only modest evidence for ovarian cancer susceptibility locus at 3p22–p25 was obtained, and no direct evidence to specify the candidate region in the locus was obtained based on the LOH analysis. Nevertheless, the investigation to identify a novel susceptibility gene in Japanese ovarian cancer families is advantageous in that positional cloning could be successfully performed on a limited number of families, since Japanese consist of a more homogeneous population racially than people in Western countries. In addition, the prospect of a project, such as an association study with more precisely designed microsatellite and/or single nucleotide polymorphism markers,

**Table 4.** Loss of heterozygosity at candidate region on 3p

| Locus          | No mutation                   |                               | <i>BRCA1</i>                  |                              |
|----------------|-------------------------------|-------------------------------|-------------------------------|------------------------------|
|                | No. of LOH cases <sup>a</sup> | No. of MSI cases <sup>a</sup> | No. of LOH cases <sup>a</sup> | <i>P</i> -value <sup>b</sup> |
| <i>D3S1297</i> | 8/16 (50.0)                   | 0                             | 14/26 (53.8)                  | NS                           |
| <i>D3S3525</i> | 11/29 (37.9)                  | 3/32 (9.4)                    | 13/28 (46.4)                  | NS                           |
| <i>D3S3630</i> | 9/36 (25.0)                   | 0                             | 15/45 (33.3)                  | NS                           |
| <i>D3S1620</i> | 11/36 (30.6)                  | 0                             | 12/43 (27.9)                  | NS                           |
| <i>D3S1560</i> | 7/18 (38.9)                   | 2/20 (10.0)                   | 16/38 (42.1)                  | NS                           |
| <i>D3S1304</i> | 14/36 (38.9)                  | 1/37 (2.7)                    | 14/44 (31.8)                  | NS                           |
| <i>D3S3591</i> | 12/24 (50.0)                  | 1/25 (4.0)                    | 8/35 (22.9)                   | 0.030                        |
| <i>D3S3691</i> | 10/26 (38.5)                  | 2/28 (7.1)                    | 10/32 (31.3)                  | NS                           |
| <i>D3S1597</i> | 6/23 (26.1)                   | 2/25 (8.0)                    | 9/30 (30.0)                   | NS                           |
| <i>D3S3611</i> | 16/31 (51.6)                  | 5/36 (13.9)                   | 13/41 (31.7)                  | NS (0.071)                   |
| <i>D3S3589</i> | 11/34 (32.4)                  | 0                             | 15/46 (32.6)                  | NS                           |
| <i>D3S3693</i> | 11/32 (34.4)                  | 4/36 (11.1)                   | 9/38 (23.7)                   | NS                           |
| <i>D3S3714</i> | 9/23 (39.1)                   | 0                             | 8/30 (26.7)                   | NS                           |
| <i>D3S1263</i> | 9/23 (39.1)                   | 5/28 (17.9)                   | 17/38 (44.7)                  | NS                           |
| <i>D3S3680</i> | 11/26 (42.3)                  | 2/28 (7.1)                    | 13/39 (33.3)                  | NS                           |
| <i>D3S1259</i> | 8/26 (30.8)                   | 6/32 (18.8)                   | 11/35 (31.4)                  | NS                           |
| <i>D3S3610</i> | 10/19 (52.6)                  | 0                             | 6/25 (24.0)                   | 0.051                        |
| <i>D3S1585</i> | 10/36 (27.8)                  | 6/42 (14.3)                   | 15/39 (38.4)                  | NS                           |
| <i>D3S3608</i> | 9/25 (36.0)                   | 5/30 (16.7)                   | 17/36 (47.2)                  | NS                           |
| <i>D3S1554</i> | 9/17 (52.9)                   | 1/18 (5.6)                    | 10/25 (40.0)                  | NS (0.30)                    |
| <i>D3S1286</i> | 10/40 (25.0)                  | 2/42 (4.8)                    | 18/47 (38.3)                  | NS                           |
| <i>D3S1293</i> | 12/32 (37.5)                  | 1/33 (3.0)                    | 14/40 (35.0)                  | NS                           |
| <i>D3S1599</i> | 12/31 (38.7)                  | 0                             | 11/26 (42.3)                  | NS                           |
| <i>D3S3659</i> | 8/30 (26.7)                   | 0                             | 12/30 (40.0)                  | NS                           |
| <i>D3S2336</i> | 7/36 (19.4)                   | 2/38 (5.3)                    | 16/40 (40.0)                  | 0.044                        |
| <i>D3S2337</i> | 10/35 (28.6)                  | 8/43 (18.6)                   | 12/36 (33.3)                  | NS                           |
| <i>D3S1283</i> | 14/35 (40.0)                  | 1/36 (2.8)                    | 14/39 (35.9)                  | NS                           |
| <i>D3S3518</i> | 11/29 (37.9)                  | 3/32 (9.4)                    | 12/28 (42.9)                  | NS                           |

LOH, loss of heterozygosity; MSI, microsatellite instability; NS, not significant.

<sup>a</sup>No. of informative cases (percentages in parentheses).

<sup>b</sup>No mutation versus *BRCA1* (Fisher's exact test).

or expression analysis of expressed sequence tag and known genes located at the 3p22–p25 region, offers an attractive model for further investigation.

## MATERIALS AND METHODS

### Families

We ascertained 196 epithelial familial ovarian cancer patients in 81 ovarian cancer families in Japan. The criterion for an ovarian cancer family involved two or more members with well documented epithelial ovarian cancer in the second degree relatives. We examined the clinical data from hospital records and pathological reports, or asked physicians to answer questionnaires or hear from patients, and confirmed that all

affected individuals were primary epithelial ovarian cancer. All experiments were performed under informed consent.

### Mutational analysis for *BRCA1* and *BRCA2*

*Direct sequencing.* A genomic DNA was prepared from lymphocytes and paraffin-embedded block using the standard phenol/chloroform methods. We performed direct sequencing of available patients with ovarian cancer in all 81 families. The entire exons, 23 in *BRCA1* and 26 in *BRCA2*, and the intronic boundary regions were sequenced in both forward and reverse directions for detecting germline mutations. The non-coding intronic regions that were analyzed did not extend >20 bp proximal to the 5' end and 10 bp distal to the 3' end of each exon. These regions were amplified by PCR respectively from

**Table 5.** Details of ovarian cancer families by number of affected members and results of *BRCA1*, 2 mutational analysis

| No. of ovarian cancer cases in a family | No. of families |              |             |
|-----------------------------------------|-----------------|--------------|-------------|
|                                         | <i>BRCA1</i>    | <i>BRCA2</i> | No mutation |
| 2                                       | 20              | 5            | 32          |
| 3                                       | 11              | 0            | 4           |
| 4                                       | 4               | 0            | 1           |
| 5+                                      | 4               | 0            | 0           |
| Total                                   | 39              | 5            | 37          |

100 ng of genomic DNA (35 reactions for *BRCA1* and 47 reactions for *BRCA2*). The PCR products were sequenced by the dideoxy method using an Autocycle sequencing kit (Pharmacia Biotech in Japan, Tokyo) and end-labeled by Cy5 primer. PCR products were electrophoresed in a 6% polyacrylamide gel and analyzed with an automatic sequencer, ALF express (Pharmacia Biotech).

*Statistical analysis.* Clinical characteristics among ovarian cancer patients were tested by unpaired *t*-test,  $\chi^2$  analysis and Fisher's exact test.

### Genome-wide linkage analysis

*Genotyping.* We used 410 microsatellite markers on the basis of the Genethon map (32). The average intermarker distance was 9.0 cM. One of the pairs of the PCR primers was end-labeled by Cy5. PCR amplification using 25 ng of DNA was carried out, and after mixing with 95% formamide and denaturation, the products were resolved by electrophoresis in 6% polyacrylamide gels and analyzed on the autosequencer, ALF express (Pharmacia Biotech). Allele assignment was performed by Fragment manager software for comparison of CEPH family members 134702. The interpretation of alleles was checked by two different individuals to verify Mendelian segregation prior to computer processing. The frequencies of the alleles of each marker were determined by DNA typing of 35 normal Japanese women with no family history of cancer (data not shown). Some of the markers which did not yield satisfactory results after two PCRs and gel electrophoresis and whose heterozygosity was <60% were replaced by additional linked markers from the Genethon map (31).

*Statistical methods.* We used two different computer programs for linkage analysis. For non-parametric and parametric analyses, the GENEHUNTER program (version 2.1) was employed (23). GENEHUNTER estimates the statistical significance of sharing alleles identical-by-descent between all affected individuals, as well as how much of the total genetic information in a segment has been extracted from the markers studied. On the other hand, for non-parametric two-point analyses, we used the SIBPAL program from the SAGE package. SIBPAL is based on methods first proposed by Haseman and Elston (24). This program is available for not only affected sib-pair analysis, but also for affected-unaffected sib-pair analysis. For both types of analyses, we set the genome-wide false positive rate at 5% and used established

criteria (32). Linkage evidence at a single point in the genome is considered significant whenever the *P*-value is  $\leq 2.2 \times 10^{-5}$  and/or the NPL score is  $\geq 3.6$ . The evidence is considered suggestive whenever the *P*-value is between  $2.2 \times 10^{-5}$  and  $7.4 \times 10^{-4}$  and/or the NPL score is between 2.2 and 3.6.

### LOH analysis

We analyzed the samples from 50 cases with no mutation in 28 families included in the linkage study and from 58 cases with *BRCA1* mutation in 39 families. PCR amplification of microsatellite repeat polymorphisms was used for the detection of LOH. Twenty-eight markers spanning the regions of interest on 3p were selected for use. PCR products from normal DNA and those from tumor DNA were compared using an auto-sequencer. Normal DNA and tumor DNA samples were electrophoresed at the same time. LOH was scored based on the absence, or a difference in the relative intensity, of alleles in the tumor compared with normal DNA. A decrease of >50% of the intensity of the bands in a tumor sample compared with normal DNA was determined as the LOH.

### ACKNOWLEDGEMENTS

We are grateful to Tsutomu Araki (Nippon Medical School), Toshihiko Iida (Utsunomiya Saiseikai Hospital), Chikashi Ishioka (Tohoku University), Masamichi Kashimura (University of Occupational and Environmental Health), Atsushi Takano (Aomori Kosei Hospital), Tetsuya Chidori (Toyama City Hospital), Ryuichiro Tsunematsu (National Cancer Center), Hideki Mizunuma (Gunma University), Makoto Murakami (Sasebo City General Hospital), Ichiro Yamadori (National Okayama Medical Center), Shigeru Arai (Saiseikai Niigata Daini Hospital), Masami Kato (Nagaoka Chuo Hospital), Noriyasu Saito (Shonai Hospital), Norihito Sudo (Nagaoka Red Cross Hospital), Takeshi Takahashi (Niigata Cancer Center Hospital), Hiroaki Takahashi (Shibata Hospital), Kohei Tanaka (Akita Red Cross Hospital), Akiteru Tokunaga (Niigata City General Hospital), Yuichi Torii (Seirei-hamamatu General Hospital), Minoru Nakamura (Saiseikai Sanjo Hospital) and Toshio Nishiyama (Kamo Hospital) for their invaluable help and contributions to this work. We are also grateful to the patients and their families for participating in this study. We thank Itsuro Inoue (Division of Genetic Diagnosis, Institute of Medical Science, University of Tokyo), Akira Tanigami (Otsuka GEN Research Institute), Tadao Arinami (Department of Medical Genetics, Institute of Basic Medical Science, University of Tsukuba) and Toshikazu Ushijima (Carcinogenesis Division, National Cancer Center Research Institute) for their many helpful suggestions, and Noriko Araki and Yukari Sato for their technical assistance in the mutational analysis of *BRCA1* and *BRCA2*. Some of the results of this paper were obtained using the program package SAGE, which is supported by a US Public Health Service Resource Grant (1 P41 RR03655) from the National Center for Research Resources. This work was supported in part by a Grant-in-Aid from the Ministry of Health and Welfare for the Second-Term Comprehensive 10-Year Strategy for Cancer Control.



## REFERENCES

- Narod, S.A., Madlensky, L., Bradley, L., Cole, D., Tonin, P., Rosen, B. and Risch, H.A. (1994) Hereditary and familial ovarian cancer in southern Ontario. *Cancer*, **74**, 2341–2346.
- Goldgar, D.E., Easton, D.F., Cannon-Albright, L.A. and Skolnick, M.H. (1994) Systematic population-based assessment of cancer risk in first-degree relatives of cancer probands. *J. Natl Cancer Inst.*, **86**, 1600–1608.
- Schildkraut, J.M., Risch, N. and Thompson, W.D. (1989) Evaluating genetic association among ovarian, breast, and endometrial cancer: evidence for a breast/ovarian cancer relationship. *Am. J. Hum. Genet.*, **45**, 521–529.
- Easton, D.F., Bishop, D.T., Ford, D. and Crockford, G.P. (1993) Genetic linkage analysis in familial breast and ovarian cancer: results from 214 families. *Am. J. Hum. Genet.*, **52**, 678–701.
- Miki, Y., Swensen, J., Shattuck-Eidens, D., Futreal, P.A., Harshman, K., Tavtigian, S., Liu, Q., Cochran, C., Bennett, L.M., Ding, W. *et al.* (1994) A strong candidate for the breast and ovarian-cancer susceptibility gene *BRCA1*. *Science*, **266**, 66–71.
- Wooster, R., Bignell, G., Lancaster, J., Swift, S., Seal, S., Mangion, J., Collins, N., Gregory, S., Gumbs, C. and Micklem, G. (1995) Identification of the breast cancer susceptibility gene *BRCA2*. *Nature*, **378**, 789–792.
- Easton, D.F., Ford, D. and Peto, J. (1993) Inherited susceptibility to breast cancer. *Cancer Surv.*, **18**, 95–113.
- Easton, D.F., Ford, D. and Bishop, D.T. (1995) Breast and ovarian cancer incidence in *BRCA1*-mutation carriers. Breast Cancer Linkage Consortium. *Am. J. Hum. Genet.*, **56**, 265–271.
- Ford, D., Easton, D.F. and Peto, J. (1995) Estimates of the gene frequency of *BRCA1* and its contribution to breast and ovarian cancer incidence. *Am. J. Hum. Genet.*, **57**, 1457–1462.
- Berchuck, A., Schildkraut, J.M., Marks, J.R. and Futreal, P.A. (1999) Managing hereditary ovarian cancer risk. *Cancer*, **86**, 1697–1704.
- Pharoah, P.D., Easton, D.F., Stockton, D.L., Gayther, S.A. and Ponder, B.A. (1999) Survival in familial, *BRCA1* and *BRCA2* associated epithelial ovarian cancer. *Cancer Res.*, **59**, 868–871.
- Gayther, S.A., Russell, P., Harrington, P., Antoniou, A.C., Easton, D.F. and Ponder, B.A. (1999) The contribution of germline *BRCA1* and *BRCA2* mutations to familial ovarian cancer: no evidence for other ovarian cancer susceptibility genes. *Am. J. Hum. Genet.*, **65**, 1021–1029.
- Aida, H., Takakuwa, K., Nagata, H., Tsuneki, I., Takano, M., Tsuji, S., Takahashi, T., Sonoda, T., Hatae, M., Takahashi, K. *et al.* (1998) Clinical features of ovarian cancer in Japanese women with germ-line mutations of *BRCA1*. *Clin. Cancer Res.*, **4**, 235–240.
- Takano, M., Aida, H., Tsuneki, I., Takakuwa, K., Hasegawa, I., Tanaka, H., Saito, M., Tsuji, S., Sonoda, T., Hatae, M. *et al.* (1997) Mutational analysis of *BRCA1* gene in ovarian cancer and breast-ovarian cancer families in Japan. *Jpn. J. Cancer Res.*, **88**, 407–413.
- Yu, Y., Xu, F., Peng, H., Fang, X., Zhao, S., Li, Y., Cuevas, B., Kuo, W.L., Gray, J.W., Siciliano, M. *et al.* (1999) *NOEY2* (ARHI), an imprinted putative tumor suppressor gene in ovarian and breast carcinomas. *Proc. Natl Acad. Sci. USA*, **96**, 214–219.
- Obata, K., Morland, S.J., Watson, R.H., Hitchcock, A., Chenevix-Trench, G., Thomas, E.J. and Campbell, I.G. (1998) Frequent *PTEN/MMAC* mutations in endometrioid but not serous or mucinous epithelial ovarian tumors. *Cancer Res.*, **58**, 2095–2097.
- Schultz, D.C., Vanderveer, L., Berman, D.B., Hamilton, T.C., Wong, A.J. and Godwin, A.K. (1996) Identification of two candidate tumor suppressor genes on chromosome 17p13.3. *Cancer Res.*, **56**, 1997–2002.
- Phillips, N.J., Zeigler, M.R. and Deaven, L.L. (1996) A cDNA from the ovarian cancer critical region of deletion on chromosome 17p13.3. *Cancer Lett.*, **102**, 85–90.
- Eccles, D.M., Forabosco, P., Williams, A., Dunn, B., Williams, C., Bishop, D.T. and Morton, N.E. (1997) Segregation analysis of ovarian cancer using diathesis to include other cancers. *Ann. Hum. Genet.*, **61**, 243–252.
- Houlston, R.S., Collins, A., Slack, J., Campbell, S., Collins, W.P., Whitehead, M.I. and Morton, N.E. (1991) Genetic epidemiology of ovarian cancer: segregation analysis. *Ann. Hum. Genet.*, **55**, 291–299.
- Auranen, A. and Iselius, L. (1998) Segregation analysis of epithelial ovarian cancer in Finland. *Br. J. Cancer*, **77**, 1537–1541.
- Kodama, S., Kase, H. and Tanaka, K. (1998) The gynecological cancer registry of Niigata in Japan. *The Niigata District Journal of the Japan Society of Obstetrics and Gynecology*, **79**, 10–26. (in Japanese)
- Kruglyak, L., Daly, M.J., Reeve-Daly, M.P. and Lander, E.S. (1996) Parametric and nonparametric linkage analysis: a unified multipoint approach. *Am. J. Hum. Genet.*, **58**, 1347–1363.
- Haseman, J.K. and Elston, R.C. (1972) The investigation of linkage between a quantitative trait and a marker locus. *Behav. Genet.*, **2**, 3–19.
- Tominaga, H., Aoki, K., Hanai, A. and Kurihara, N. (1993) *The Statistical Yearbook for the Cancer*. Shinohara Press, Japan. (in Japanese)
- Korn, W.T., Schatzki, S.C., DiSciullo, A.J. and Scully, R.E. (1990) Papillary cystadenoma of the broad ligament in von Hippel-Lindau disease. *Am. J. Obstet. Gynecol.*, **163**, 596–598.
- Karsdorp, N., Elderson, A., Wittebol-Post, D., Hene, R.J., Vos, J., Feldberg, M.A., van Gils, A.P., Jansen-Schillhorn van Veen, J.M., Vroom, T.M., Hoppener J.W. *et al.* (1994) Von Hippel-Lindau disease: new strategies in early detection and treatment. *Am. J. Med.*, **97**, 158–168.
- Cheo, D.L., Burns, D.K., Meira, L.B., Houle, J.F. and Friedberg, E.C. (1999) Mutational inactivation of the xeroderma pigmentosum group C gene confers predisposition to 2-acetylaminofluorene-induced liver and lung cancer and to spontaneous testicular cancer in *Trp53-/-* mice. *Cancer Res.*, **59**, 771–775.
- Lu, S.L., Kawabata, M., Imamura, T., Akiyama, Y., Nomizu, T., Miyazono, K. and Yuasa, Y. (1998) HNPCC associated with germline mutation in the TGF-beta type II receptor gene. *Nat. Genet.*, **19**, 17–18.
- Tannergard, P., Liu, T., Weger, A., Nordenskjold, M. and Lindblom, A. (1997) Tumorigenesis in colorectal tumors from patients with hereditary non-polyposis colorectal cancer. *Hum. Genet.*, **101**, 51–55.
- Dib, C., Faure, S., Fizames, C., Samson, D., Drouot, N., Vignal, A., Millasseau, P., Marc, S., Hazan, J., Seboun, E. *et al.* (1996) A comprehensive genetic map of the human genome based on 5264 microsatellites. *Nature*, **380**, 152–154.
- Lander, E. and Kruglyak, L. (1995) Genetic dissection of complex traits: guidelines for interpreting and reporting linkage results. *Nat. Genet.*, **11**, 241–247.
